# Supplementary material for: Sexual Dimorphism in the Multielemental Stoichiometric Phenotypes and Stoichiometric Niches of Spiders
Source: Preprints.org preprint supplement (doi:10.20944/preprints202007.0073.v1), 2020-07-05
Supplement: Supplementary file 1 [file supplementary]

## Sheet: S1
		Concentrations											Molar ratios
taxon	nr of individuals	Ca (mg/kg)	Cu (mg/kg)	Fe (mg/kg)	Mg (mg/kg)	Mn (mg/kg)	K (mg/kg)	Na (mg/kg)	Zn (mg/kg)	P (%)	N (%)	C (%)	C/N	C/P	N/P
Steatoda grossa females	6	1150.19	16.8732	151.979	1405.57	6.53512	5115.9	3886.51	188.025	0.4167	9.03	56.42	7.28854	349.147	47.9035
Steatoda grossa females	7	1194.21	20.9278	210.678	1557.17	8.18784	7151.87	5167	201.828	0.755391	9.02	56.26	7.27593	192.055	26.396
Steatoda grossa females	6	1209.87	26.8221	134.369	1511.81	10.6887	5606.46	4709.83	195.517	0.706021	8.84	56.38	7.43991	205.923	27.6782
Steatoda grossa females	7	862.777	12.0759	119.092	1171.41	7.20699	4962.12	4197.98	146.875	0.625034	8.45	57.47	7.93377	237.102	29.8852
Steatoda grossa females	5	742.554	18.8927	184.077	1612.81	8.88723	7524.61	5131.71	211.896	0.605664	9.3	55.3	6.93645	235.446	33.9433
Steatoda grossa females	11	779.976	15.9022	182.713	1282.36	8.12886	6338.97	4844.53	154.01	0.696366	9.06	56.44	7.26698	209.001	28.7603
Steatoda grossa females	8	767.703	17.4335	114.139	1286.77	7.25869	4929.33	4257.15	135.451	0.636717	9.04	56.37	7.27402	228.297	31.3852
Steatoda grossa females	7	1371.63	25.2526	138.203	1755.21	10.8622	7945.55	4882.84	209.284	0.739675	9.045	55.775	7.19327	194.445	27.0315
Steatoda grossa females	5	1150.49	21.9915	192.667	1574.37	9.13526	5702.23	4044	192.129	0.443373	9	56.08	7.26876	326.165	44.8721
Steatoda grossa females	7	999.938	22.1295	87.3567	1722.06	10.108	7658.93	4969.17	205.369	0.442966	8.8	56.51	7.49096	328.968	43.9153
Steatoda grossa females	6	977.35	19.0221	79.0264	1598.25	10.4045	7726.4	5025.21	185.563	0.692492	9.16	55.69	7.09213	207.377	29.2404
Steatoda grossa females	7	838.929	23.5143	134.001	1527.21	12.1465	7842.16	5147.93	179.207	0.743341	9.03	55.87	7.21749	193.816	26.8536
Steatoda grossa females	8	808.407	16.5837	139.318	1264.37	7.29893	6240.53	4024.18	154.403	0.600541	9.07	56.49	7.2654	242.564	33.3863
Steatoda grossa females	6	853.688	21.7037	120.076	1420.53	11.8631	6530.86	4454.32	176.548	0.711861	9.23	56.91	7.19254	206.154	28.6622
Steatoda grossa females	7	1013.55	24.9927	119.658	1808.42	9.02956	8055.45	4966.13	217.013	0.871696	9.66	54.79	6.61636	162.082	24.4971
Steatoda grossa males	30	743.843	59.5795	387.383	1845.65	16.3581	11861.9	7746.37	278.45	0.505972	11.75	46.8	4.64626	238.516	51.3351
Steatoda grossa males	57	630.799	69.7293	384.52	1980.38	15.5384	12252.5	8037.91	315.269	0.778669	11.38	47.51	4.8701	157.337	32.3067
Steatoda grossa males	62	545.704	85.349	475.451	1712.71	22.2839	11818.5	7784.59	272.75	0.644175	10.91	48.45	5.18041	193.949	37.439
Tegenaria sp. females	6	893.624	20.545	221.603	1953.08	12.6712	15649.7	6727.71	202.357	0.639172	11.14	51.3	5.37189	206.966	38.5275
Tegenaria sp. females	7	1015.39	30.4667	302.901	1772.03	6.77686	13385.9	6135.14	166.77	0.502468	10.83	51.48	5.54505	264.198	47.6457
Tegenaria sp. females	5	1034.82	23.3322	211.088	2025.58	13.1349	12320.5	5687.44	190.865	0.466616	10.1	53	6.12138	292.896	47.8481
Tegenaria sp. females	5	970.198	34.3243	283.461	1872.1	6.20791	12446.4	5569.58	185.084	0.822579	10.3	52.75	5.97421	165.365	27.6798
Tegenaria sp. females	4	980.837	36.9391	279.805	1997	7.47015	12496.5	5624.12	203.211	0.512874	10.42	52.02	5.82368	261.552	44.9118
Tegenaria sp. females	4	937.425	44.5635	280.187	1993.88	11.4394	12903.1	5067.72	214.398	0.468119	9.9	53.1	6.25683	292.507	46.75
Tegenaria sp. males	9	1132.04	29.7712	204.349	1952.93	7.95581	18206.4	6846.54	194.451	0.881123	12.02	48.88	4.74375	143.052	30.1558
Tegenaria sp. males	6	1012.4	32.6302	229.338	1877.55	11.8766	17494.6	6853.71	187.203	0.936146	11.91	49.35	4.8336	135.938	28.1236
Lycosidae	21	1374.39	212.13	142.331	2093.03	49.9486	13002.9	6298.24	379.465	0.558456	12.2	48.49	4.63647	223.904	48.2918
Lycosidae	14	2559.76	286.597	165.672	2136.9	47.0569	10669.9	5313.95	457.678	1.19334	12.04	47.62	4.61379	102.902	22.3032
Lycosidae	3	2655.78	222.794	165.68	2346.56	44.2673	10423.9	6126.69	523.006	1.19795	11.59	48.82	4.91371	105.089	21.387
Lycosidae	18	1105.29	111.353	278.394	2050.1	94.799	11539.2	5536.83	305.65	1.02002	11.87	48.06	4.72311	121.499	25.7244
Salticidae males	54	1243.38	115.901	166.734	1295.46	23.8274	12433	4573.83	308.86	0.481607	12.27	49.12	4.66991	263.005	56.319
Salticidae females	44	928.758	88.3447	183.617	1200.81	24.7997	12776.1	4130.9	302.634	0.75524	10.97	51.69	5.49661	176.49	32.1089
Salticidae males and females	95	1217.17	108.553	468.951	1294.61	27.1648	12485.3	4585.31	396.455	0.449473	11.92	58.955	5.76952	338.233	58.6241
Thomisidae	14	2616.99	135.784	167.817	2351.87	51.9483	12293.7	3828.41	523.684	1.1052	12.22	48.36	4.61647	112.835	24.4418
Thomisidae	51	1001.37	68.5359	129.931	1964.33	36.1026	14872.3	4252.91	397.398	1.20906	12.27	66.5	6.32226	141.831	22.4336
Thomisidae	21	762.073	52.9615	163.188	1348	23.6417	12938.8	4098.22	178.629	0.52107	12.91	49.17	4.44293	243.334	54.7688
Thomisidae	40	1918.92	105.796	130.535	2084.6	44.0399	11742.8	3471.61	356.266	1.07455	11.96	48.84	4.76365	117.205	24.6041
Thomisidae	100	1015.12	104.057	122.751	1502.19	37.3534	12217.5	3514.17	191.792	0.59042	12.25	48.05	4.57565	209.86	45.8647
Thomisidae	100	805.462	87.2386	119.457	2061.59	48.3704	12597.3	3779.42	569.739	1.09728	12.1	47.9	4.61791	112.568	24.3765
Araneus sp. females	4	860.783	87.2271	313.458	1339.49	27.3153	12123.9	4123.55	224.795	1.05583	12.54	48.96	4.55448	119.577	26.2548
Araneus sp. females	8	1371.36	104.337	520.876	1676.57	34.2174	14794.6	4234.24	298.755	0.460918	12.5	48.32	4.50933	270.334	59.95
Araneus sp. females	1	886.708	61.7122	159.467	1448.71	73.7598	8099.84	2619.77	236.545	0.500952	10.79	51.23	5.53857	263.71	47.6133
Araneus sp. females	3	1311.9	64.9147	182.46	1625.32	44.7308	8770.75	3149.38	199.874	0.603856	10.81	50.69	5.47006	216.465	39.5727
Araneus sp. females	4	930.747	50.2693	156.416	1495.26	38.2619	9513.36	3110.4	207.642	0.897387	10.94	50.05	5.33681	143.821	26.9489
Araneus sp. females	5	1197	61.4594	167.43	1897.1	50.6427	10080.7	3007.3	179.09	0.577697	11.09	49.63	5.22045	221.535	42.436
Araneus sp. females	5	992.887	50.9901	164.034	1747.77	37.8519	9691.41	3467.02	217.758	0.572551	11.42	68.35	6.9818	307.838	44.0915
Araneus sp. females	6	1007.75	54.8767	156.8	1756.05	33.7739	12038.3	3431.35	236.733	1.0987	11.38	49.14	5.03719	115.334	22.8964
Araneus sp. females	7	1359.98	64.0777	202.659	1726.73	47.3481	12729.9	3834.37	205.342	0.746681	11.86	47.59	4.68087	164.353	35.1117
Araneus sp. females	9	912.523	59.95	176.365	1502.31	36.2836	10775.1	3313.2	226.35	0.814296	11.43	49.18	5.01923	155.741	31.0289
Araneus sp. females	10	994.735	67.4052	187.646	1754.86	46.5786	13533.5	4052.76	234.66	0.881091	12.31	48.14	4.56187	140.891	30.8845
Araneus sp. females	15	1270.38	64.7461	203.88	1781.74	49.7816	13864.7	3853.7	250.885	0.712828	12.05	47.18	4.56737	170.676	37.3685
Araneus sp. females	8	1648.08	71.4033	305.831	1556.94	40.5965	10004.8	2846.57	183.171	1.01827	10.47	50.11	5.58307	126.899	22.7293
Araneus sp. males	14	697.338	66.1446	229.433	1077.42	21.9947	9055.09	3949.78	251.196	0.865598	12.36	46.04	4.34522	137.157	31.565
